# Supplementary material
Source: HighWire-hosted journal article supplement (https://bmjopen.bmj.com/content/13/7/e067677)
Supplement: inline-supplementary-material-1 [file inline-supplementary-material-1.pdf]

**Supplementary Table 1, online only. Factors associated to length of stay by the univariate analysis (n = 748)**

| Variable                                     | $\beta$ (95% CI)     | P      |
|----------------------------------------------|----------------------|--------|
| Gender                                       |                      |        |
| Male                                         | Reference            |        |
| Female                                       | -3.06 (-5.00- -1.13) | 0.002  |
| Age, years                                   | -0.06 (-0.13-0.01)   | 0.090  |
| Number of historical hospitalizations, times | 0.40 (-0.03-0.83)    | 0.069  |
| Surgery history                              |                      |        |
| Yes                                          | Reference            |        |
| No                                           | -0.33 (-1.75-1.10)   | 0.652  |
| Vascular disease history                     |                      |        |
| Yes                                          | Reference            |        |
| No                                           | -0.07 (-2.00-1.86)   | 0.941  |
| Drinking history                             |                      |        |
| Yes                                          | Reference            |        |
| No                                           | -1.28 (-2.81-0.24)   | 0.100  |
| Smoking history                              |                      |        |
| Yes                                          | Reference            |        |
| No                                           | -1.283 (-2.67-0.21)  | 0.095  |
| Insurance type                               |                      |        |
| Out-of-pocket                                | Reference            |        |
| Urban and rural resident medical insurance   | -1.09 (-4.84-2.66)   | 0.570  |
| Social insurance                             | -0.1 (-3.623-3.36)   | 0.940  |
| Employee medical insurance                   | -0.24 (-3.76-3.29)   | 0.895  |
| Surgical approach                            |                      |        |
| No surgery                                   | Reference            |        |
| Open surgery                                 | 8.76 (6.08-11.44)    | <0.001 |
| Interventional surgery                       | 2.77 (0.95-4.58)     | 0.003  |

|                         |                    |       |
|-------------------------|--------------------|-------|
| Diseased limb           |                    |       |
| Unilateral lower limb   | Reference          |       |
| Bilateral lower limbs   | -0.05 (-1.50-1.41) | 0.948 |
| Weight loss             |                    |       |
| Yes                     | Reference          |       |
| No                      | -4.21 (-9.12-0.70) | 0.094 |
| Rest pain               |                    |       |
| Yes                     | Reference          |       |
| No                      | 0.92 (-0.93, 2.76) | 0.330 |
| Fontaine classification |                    |       |
| Class I                 | Reference          |       |
| Class II                | 0.64 (-2.93-4.21)  | 0.726 |
| Class III               | -2.85 (-8.23-2.52) | 0.300 |
| Class IV                | 0.06 (-4.30-4.42)  | 0.979 |
| ACCI, scores            | -0.05 (-0.51-0.41) | 0.824 |
| Urea, mmol/L            | -0.12 (-0.37-0.14) | 0.362 |
| CRP, mg/L               | 0 (-0.02-0.01)     | 0.567 |
| TP, g/L                 | 0.10 (-0.04-0.23)  | 0.166 |
| LDL-C, mmol/L           | -0.35 (-1.10-0.41) | 0.371 |
| HDL-C, mmol/L           | -0.40 (-2.84-2.05) | 0.751 |
| FIB, g/L                | 0.29 (-0.22-0.79)  | 0.269 |
| APTT, s                 | 0 (-0.08-0.07)     | 0.994 |
| TT, s                   | -0.04 (-0.12-0.03) | 0.262 |
| PT-INR                  | 0.52 (-4.25-5.30)  | 0.830 |

*CI*, Confidence interval;  $\beta$ , regression coefficients; *ACCI*, age-adjusted Charlson comorbidity index; *CRP*, C-reactive protein; *TP*, total protein; *LDL-C*, low density lipoprotein cholesterol; *HDL-C*, high density lipoproteins cholesterol; *FIB*, fibrinogen; *APTT*, activated partial thromboplastin time; *TT*, thrombin time; *PT-INR*, prothrombin time international normalized ratio.

Supplementary Table 2, online only. Estimated coefficients for explanatory variables associated with length of stay by generalized linear model

| Variable                                     | Estimate  | SE   | t value | 95%CI       | P     |
|----------------------------------------------|-----------|------|---------|-------------|-------|
| Intercept                                    | 11.19     | 7.96 | 1.41    | -4.40-26.79 | 0.160 |
| Hcy                                          | 0.16      | 0.05 | 3.03    | 0.06-0.26   | 0.002 |
| Gender                                       |           |      |         |             |       |
| Male                                         | Reference |      |         |             |       |
| Female                                       | -2.05     | 1.21 | -1.69   | -4.42-0.32  | 0.091 |
| Age, years                                   | -0.07     | 0.05 | -1.41   | -0.17-0.03  | 0.160 |
| Number of historical hospitalizations, times | 0.14      | 0.26 | 0.55    | -0.37-0.66  | 0.582 |
| Surgery history                              |           |      |         |             |       |
| Yes                                          | Reference |      |         |             |       |
| No                                           | -1.02     | 0.88 | -1.15   | -2.74-0.71  | 0.249 |
| Vascular disease history                     |           |      |         |             |       |
| Yes                                          | Reference |      |         |             |       |
| No                                           | 0.72      | 1.28 | 0.56    | -1.80-3.23  | 0.578 |
| Drinking history                             |           |      |         |             |       |
| Yes                                          | Reference |      |         |             |       |
| No                                           | 0.68      | 0.94 | 0.72    | -1.16-2.52  | 0.470 |
| Smoking history                              |           |      |         |             |       |
| Yes                                          | Reference |      |         |             |       |

|                                            |           |      |       |             |        |
|--------------------------------------------|-----------|------|-------|-------------|--------|
| No                                         | -0.02     | 0.97 | -0.02 | -1.92-1.87  | 0.982  |
| Insurance type                             |           |      |       |             |        |
| Out-of-pocket                              | Reference |      |       |             |        |
| Urban and rural resident medical insurance | -1.25     | 2.24 | -0.56 | -5.63-3.13  | 0.577  |
| Social insurance                           | 1.17      | 2.07 | 0.56  | -2.89-5.23  | 0.573  |
| Employee medical insurance                 | -0.60     | 2.10 | -0.28 | -4.71-3.51  | 0.776  |
| Surgical approach                          |           |      |       |             |        |
| No surgery                                 | Reference |      |       |             |        |
| Open surgery                               | 7.88      | 1.94 | 4.07  | 4.08-11.67  | <0.001 |
| Interventional surgery                     | 2.21      | 1.21 | 1.82  | -0.17-4.59  | 0.070  |
| Diseased limb                              |           |      |       |             |        |
| Unilateral lower limb                      | Reference |      |       |             |        |
| Bilateral lower limbs                      | 0.24      | 0.81 | 0.29  | -1.35-1.83  | 0.770  |
| Weight loss                                |           |      |       |             |        |
| Yes                                        | Reference |      |       |             |        |
| No                                         | -4.03     | 3.13 | -1.29 | -10.17-2.11 | 0.199  |
| Rest pain                                  |           |      |       |             |        |
| Yes                                        | Reference |      |       |             |        |
| No                                         | 0.30      | 1.41 | 0.21  | -2.46-3.06  | 0.830  |
| Fontaine classification                    |           |      |       |             |        |
| Class I                                    | Reference |      |       |             |        |
| Class II                                   | -2.35     | 2.20 | -1.07 | -6.66-1.97  | 0.288  |
| Class III                                  | -4.88     | 3.05 | -1.60 | -10.86-1.10 | 0.110  |

|               |       |      |       |            |       |
|---------------|-------|------|-------|------------|-------|
| Class IV      | -2.73 | 2.57 | -1.06 | -7.77-2.31 | 0.289 |
| ACCI, scores  | 0.01  | 0.35 | 0.03  | -0.67-0.69 | 0.973 |
| Urea, mmol/L  | -0.11 | 0.14 | -0.79 | -0.38-0.16 | 0.431 |
| CRP, mg/L     | 0.01  | 0.02 | 0.49  | -0.02-0.04 | 0.621 |
| TP, g/L       | 0.02  | 0.07 | 0.26  | -0.13-0.16 | 0.794 |
| LDL-C, mmol/L | 0.02  | 0.43 | 0.05  | -0.83-0.87 | 0.961 |
| HDL-C, mmol/L | 0.81  | 1.45 | 0.56  | -2.03-3.65 | 0.577 |
| FIB, g/L      | 0.16  | 0.43 | 0.36  | -0.69-1.00 | 0.718 |
| APTT, s       | -0.03 | 0.09 | -0.40 | -0.20-0.13 | 0.688 |
| TT, s         | -0.03 | 0.04 | -0.69 | -0.10-0.05 | 0.491 |
| PT-INR        | 3.91  | 3.05 | 1.28  | -2.08-9.89 | 0.201 |

Insurance type and surgical approach were coded as binary dummy variables.

*Hcy*, homocysteine; *CI*, Confidence interval; *ACCI*, age-adjusted Charlson comorbidity index; *CRP*, C-reactive protein; *TP*, total protein; *LDL-C*, low density lipoprotein cholesterol; *HDL-C*, high density lipoproteins cholesterol; *FIB*, fibrinogen; *APTT*, activated partial thromboplastin time; *TT*, thrombin time; *PT-INR*, prothrombin time international normalized ratio.

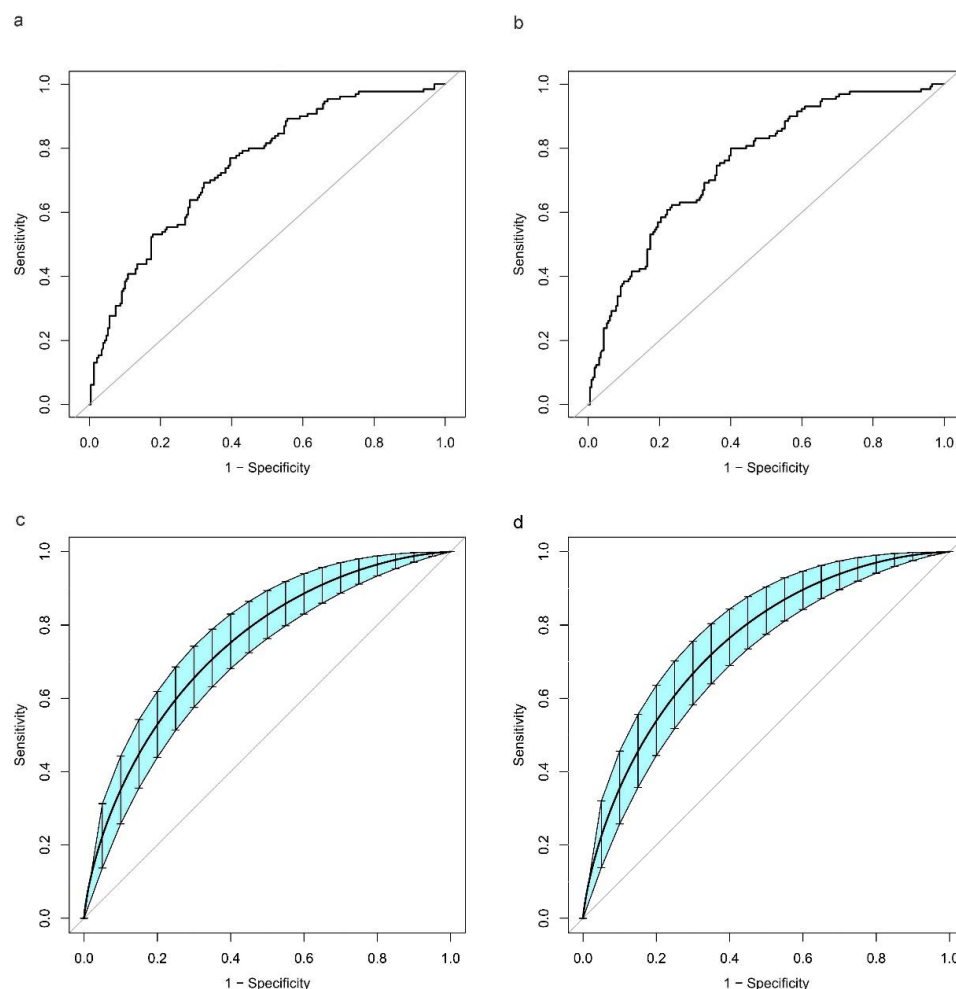

**Supplementary Figure 1, online only.** Receiver operating characteristic curves for predicting a length of stay of > 9 days. (a) Reference model in predicting a LOS of > 9 days in LEAD patients; (b) Reference model adding Hcy level in predicting a LOS of > 9 days in LEAD patients; (c) Reference model in predicting a LOS of > 9 days in LEAD patients by using bootstrap resampling (500 times); (d) Reference model adding Hcy level in predicting a LOS of > 9 days in LEAD patients by using bootstrap resampling (500 times). The variables in the reference model included gender, age, number of historical hospitalizations, surgical history, vascular disease history, drinking history, smoking history, insurance type, surgical approach, diseased limb, rest pain, Fontaine

classification, ACCI, Urea, CRP, TP, LDL-C, HDL-C, FIB, APTT, TT, and PT-INR.

*LEAD*, Lower extremity arterial disease; *Hcy*, homocysteine; *LOS*, length of stay; *ACCI*, age-adjusted Charlson comorbidity index; *CRP*, C-reactive protein; *TP*, total protein; *LDL-C*, low density lipoprotein cholesterol; *HDL-C*, high density lipoproteins cholesterol; *FIB*, fibrinogen; *APTT*, activated partial thromboplastin time; *TT*, thrombin time; *PT-INR*, prothrombin time international normalized ratio.

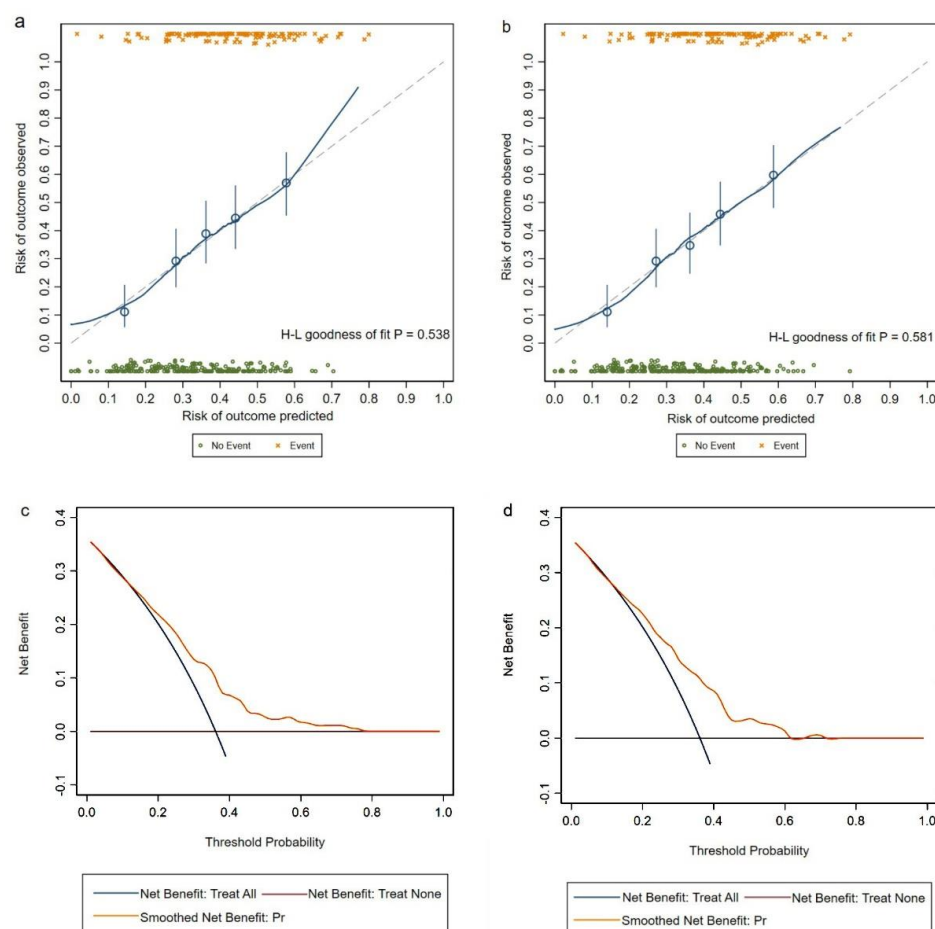

**Supplementary Figure 2, online only.** Calibration plots and decision curve analysis for predicting a length of stay of > 9 days. (a) Calibration plot: reference model in predicting a LOS of > 9 days in LEAD patients; (b) Calibration plot: reference model adding Hcy level in predicting a LOS of > 9 days in LEAD patients. The prediction accuracy increased when the solid line was closer to the dotted line. (c) Decision curve analysis: reference model in predicting a LOS of > 9 days in LEAD patients; (d) Decision curve analysis: reference model adding Hcy level in predicting a LOS of > 9 days in LEAD patients. The orange solid line is from the prediction model, the blue line is for all patients with LOS of > 9 days, and the red horizontal line indicates no patients



with LOS of > 9 days. The graph depicts the expected net benefit per patient relative to the prediction of LOS of > 9 days risk. The net benefit increases as the model curve is extended. The variables in the reference model included gender, age, number of historical hospitalizations, surgical history, vascular disease history, drinking history, smoking history, insurance type, surgical approach, diseased limb, rest pain, Fontaine classification, ACCI, Urea, CRP, TP, LDL-C, HDL-C, FIB, APTT, TT, and PT-INR.

*LEAD*, Lower extremity arterial disease; *Hcy*, homocysteine; *LOS*, length of stay; *ACCI*, age-adjusted Charlson comorbidity index; *CRP*, C-reactive protein; *TP*, total protein; *LDL-C*, low density lipoprotein cholesterol; *HDL-C*, high density lipoproteins cholesterol; *FIB*, fibrinogen; *APTT*, activated partial thromboplastin time; *TT*, thrombin time; *PT-INR*, prothrombin time international normalized ratio.
